# Supplementary material for: Short-Term Exposure to Air Pollution and Cardiac Arrhythmia: A Meta-Analysis and Systematic Review
Source: PubMed Central journal article supplement (PMC4962183; doi:10.3390/ijerph13070642), 2016-06-28
Supplement: ijerph-13-00642-s001.pdf [file ijerph-13-00642-s001.pdf]

# Supplementary Materials: Short-Term Exposure to Air Pollution and Cardiac Arrhythmia: A Meta-Analysis and Systematic Review

Xuping Song, Yu Liu, Yuling Hu, Xiaoyan Zhao, Jinhui Tian, Guowu Ding and Shigong Wang

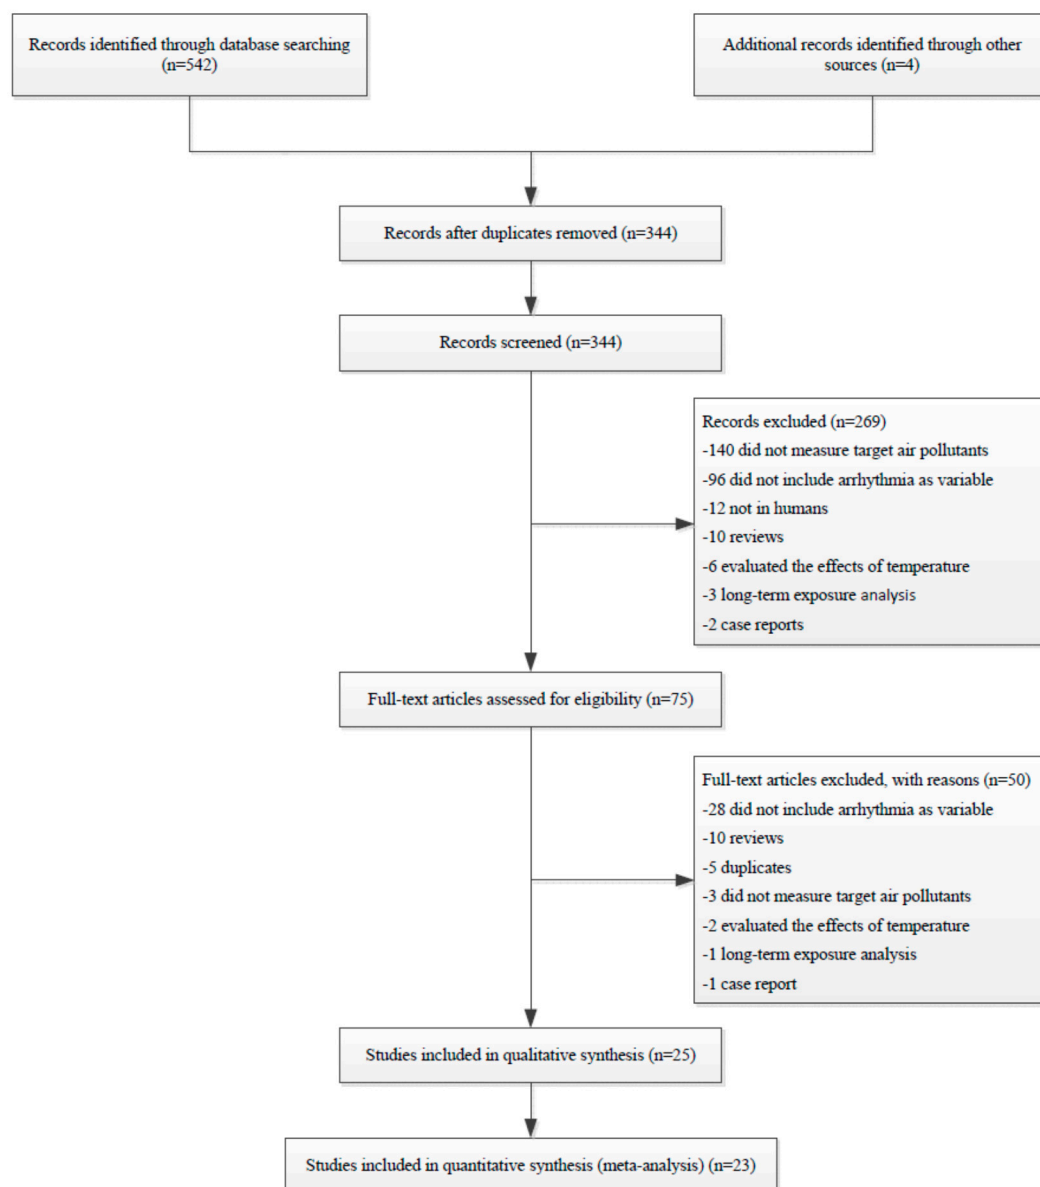

Figure S1. Flow chart of the literature screening process.

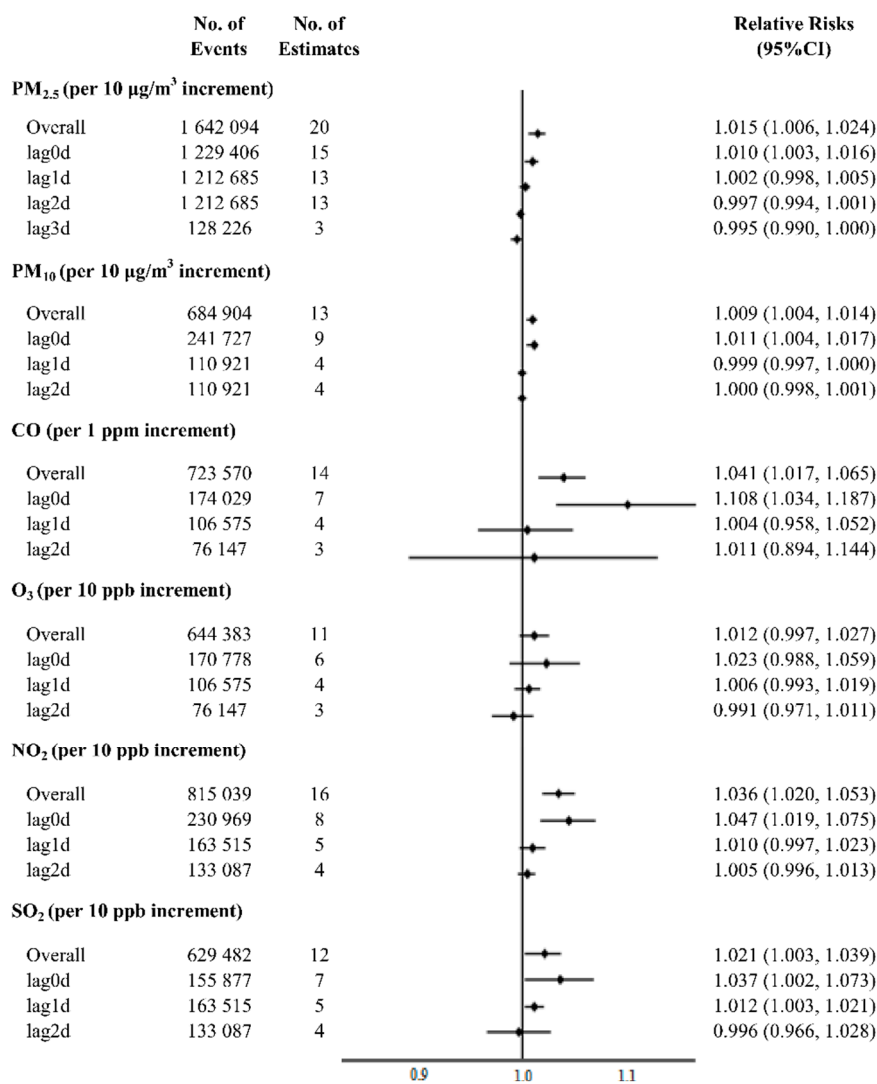

**Figure S2.** Association between particulate and gaseous components with hospitalization or mortality due to arrhythmia.

**Table S1.** Search Strategy for PubMed.

| No. | Search Strategy                                                                                                                                                                                                                                                                                                                                                                                                                                                                                                                           |
|-----|-------------------------------------------------------------------------------------------------------------------------------------------------------------------------------------------------------------------------------------------------------------------------------------------------------------------------------------------------------------------------------------------------------------------------------------------------------------------------------------------------------------------------------------------|
| #1  | air pollution*/or air pollutant*/or air polluted/or air contamination*/or atmosphere pollution*/or atmosphere pollutant*/ or atmosphere contamination*/or atmospheric pollution*/or atmospheric pollutant*/or atmospheric contamination*/or "particulate matter"/or "PM <sub>10</sub> "/or "PM <sub>2.5</sub> "/or ozone/ or "O <sub>3</sub> "/or "carbon monoxide"/or carbonmonoxide/or "CO"/or "nitrogen dioxide"/or "NO <sub>2</sub> "/or "sulphur dioxide"/or "sulphur dioxyde"/or "sulfurous anhydride"/or "SO <sub>2</sub> ".ti,ab. |
| #2  | Air Pollution/or Particulate Matter/or Ozone/or Carbon Monoxide/or Nitrogen Dioxide/or Sulfur Dioxide.sh.                                                                                                                                                                                                                                                                                                                                                                                                                                 |
| #3  | or/1,2                                                                                                                                                                                                                                                                                                                                                                                                                                                                                                                                    |
| #4  | arrhythmia* /or dysrhythmia* /or "CA".ti,ab.                                                                                                                                                                                                                                                                                                                                                                                                                                                                                              |
| #5  | Arrhythmias, Cardiac.sh.                                                                                                                                                                                                                                                                                                                                                                                                                                                                                                                  |
| #6  | "Sick Sinus Syndrome"/or "SSS"/or "Sick Sinus Node Syndrom"/or Sinus Node Dysfunction*/or Sinus Node Disease*/or Sinus Arrest*.ti,ab.                                                                                                                                                                                                                                                                                                                                                                                                     |
| #7  | Arrhythmia, Sinus/or Sick Sinus Syndrome/or Sinus Arrest, Cardiac.sh.                                                                                                                                                                                                                                                                                                                                                                                                                                                                     |
| #8  | atrial fibrillation*/or auricular fibrillation*/or "AF".ti,ab.                                                                                                                                                                                                                                                                                                                                                                                                                                                                            |
| #9  | Atrial Fibrillation.sh.                                                                                                                                                                                                                                                                                                                                                                                                                                                                                                                   |
| #10 | Atrial Flutter*/or Auricular Flutter*.ti,ab.                                                                                                                                                                                                                                                                                                                                                                                                                                                                                              |
| #11 | Atrial Flutter.sh.                                                                                                                                                                                                                                                                                                                                                                                                                                                                                                                        |
| #12 | Bradycardia*/or Bradyarrhythmia*.ti,ab.                                                                                                                                                                                                                                                                                                                                                                                                                                                                                                   |
| #13 | Bradycardia.sh.                                                                                                                                                                                                                                                                                                                                                                                                                                                                                                                           |
| #14 | "St Segment Elevation"/or "Sudden Death Syndrome"/or "Sudden Unexplained Death Syndrome"/or "Brugada ECG Pattern".ti,ab.                                                                                                                                                                                                                                                                                                                                                                                                                  |
| #15 | Brugada Syndrome.sh.                                                                                                                                                                                                                                                                                                                                                                                                                                                                                                                      |
| #16 | Premature Beat*/or Extrasystole*/or Ectopic Heartbeat*/or Atrial Premature Complex*/or Premature Supraventricular Beat*/or Premature Atrial Beat*/or "Premature Atrial Complex"/or Premature Atrial Contraction*/or Atrial Ectopic Beat*/or Atrial Extrasystole*/or Premature Ventricular Beat*/or "Premature Ventricular Complex"/or Ventricular Ectopic Beat*/or "Ventricular Premature Complex"/or Ventricular Extrasystole*/or Premature Ventricular Contraction*.ti,ab.                                                              |
| #17 | Cardiac Complexes, Premature/or Atrial Premature Complexes/or Ventricular Premature Complexes.sh.                                                                                                                                                                                                                                                                                                                                                                                                                                         |
| #18 | "Commotio Cordis"/or Cardiac Concussion*.ti,ab.                                                                                                                                                                                                                                                                                                                                                                                                                                                                                           |
| #19 | Commotio Cordis.sh.                                                                                                                                                                                                                                                                                                                                                                                                                                                                                                                       |
| #20 | Heart Block*/or Auriculo-Ventricular Dissociation*/or Atrioventricular Dissociation*/or A V Dissociation*/or "Adams Stokes Syndrome"/or "Stokes Adams Attacks"/or "Stokes Adams Syndrome"/or Atrioventricular Block*/or AV Block*/or Atrioventricular Conduction Block*/or Bundle Branch Block*/or Fascicular Block*/or Sinoatrial Block*/or Sinoatrial Exit Block*.ti,ab.                                                                                                                                                                |
| #21 | Heart Block/or Adams-Stokes Syndrome/or Atrioventricular Block/or Bundle-Branch Block/or Sinoatrial Block.sh.                                                                                                                                                                                                                                                                                                                                                                                                                             |
| #22 | "Andersen Syndrome"/or "Andersen Tawil Syndrome"/or "Jervell Lange Nielsen Syndrome"/or Surdo Cardiac Syndrome*/or "Romano Ward Syndrome"/or "Long QT Syndrome".ti,ab.                                                                                                                                                                                                                                                                                                                                                                    |
| #23 | Long QT Syndrome/or Andersen Syndrome/or Jervell-Lange Nielsen Syndrome/or Romano-Ward Syndrome.sh.                                                                                                                                                                                                                                                                                                                                                                                                                                       |
| #24 | Parasystole*.ti,ab.                                                                                                                                                                                                                                                                                                                                                                                                                                                                                                                       |
| #25 | Parasystole.sh.                                                                                                                                                                                                                                                                                                                                                                                                                                                                                                                           |
| #26 | Preexcitation Syndrome*/or Pre Excitation Syndrome*/or "Lown Ganong Levine Syndrome"/or "Parkinson White Syndrome"/or "WPW Syndrome".ti,ab.                                                                                                                                                                                                                                                                                                                                                                                               |
| #27 | Pre-Excitation Syndromes/or Lown-Ganong-Levine Syndrome/or Pre-Excitation, Mahaim-Type/or Wolff-Parkinson-White Syndrome.sh.                                                                                                                                                                                                                                                                                                                                                                                                              |
| #28 | Tachyarrhythmia*/or Tachycardia*/or Accelerated Idioventricular Rhythm*/or "AIVR"/or "Torsade de Pointes"/or "Torsades de Pointes".ti,ab.                                                                                                                                                                                                                                                                                                                                                                                                 |

**Table S1.** *Cont.*

| <b>No.</b> | <b>Search Strategy</b>                                                                                                                                                                                                                                                                                                                                                             |
|------------|------------------------------------------------------------------------------------------------------------------------------------------------------------------------------------------------------------------------------------------------------------------------------------------------------------------------------------------------------------------------------------|
| #29        | Tachycardia/or Tachycardia, Paroxysmal/or Tachycardia, Reciprocating/or Tachycardia, Atrioventricular Nodal Reentry/or Tachycardia, Sinoatrial Nodal Reentry/or Tachycardia, Supraventricular/or Tachycardia, Ectopic Atrial/or Tachycardia, Ectopic Junctional/or Tachycardia, Sinus/or Tachycardia, Ventricular/or Accelerated Idioventricular Rhythm/or Torsades de Pointes.sh. |
| #30        | Ventricular Fibrillation*.ti,ab.                                                                                                                                                                                                                                                                                                                                                   |
| #31        | Ventricular Fibrillation.sh.                                                                                                                                                                                                                                                                                                                                                       |
| #32        | Ventricular Flutter*.ti,ab.                                                                                                                                                                                                                                                                                                                                                        |
| #33        | Ventricular Flutter.sh.                                                                                                                                                                                                                                                                                                                                                            |
| #34        | or/3-33                                                                                                                                                                                                                                                                                                                                                                            |
| #35        | "time series".all.                                                                                                                                                                                                                                                                                                                                                                 |
| #36        | "case crossover".all.                                                                                                                                                                                                                                                                                                                                                              |
| #37        | or/35,36                                                                                                                                                                                                                                                                                                                                                                           |
| #38        | and/3,34,37                                                                                                                                                                                                                                                                                                                                                                        |

**Table S2.** Details of included studies in the systematic review.

| Author            | Year | Location                  | Period    | Study Design   | Outcome   | Population | No. of Events | Data Source                                                                    |
|-------------------|------|---------------------------|-----------|----------------|-----------|------------|---------------|--------------------------------------------------------------------------------|
| Barnett et al.    | 2006 | Australia and New Zealand | 1998–2001 | Case-Crossover | HA §      | ≥15 years  | NR *          | Government health departments (Australia) and ministry of health (New Zealand) |
| Talbott et al.    | 2014 | USA                       | 2001–2008 | Case-Crossover | HA        | All        | 1,008,901     | Hospital discharge records                                                     |
| Guo et al.        | 2008 | China                     | 2004–2006 | Case-Crossover | HA        | All        | 1149          | Emergency department registry                                                  |
| Chiu et al.       | 2013 | Taiwan                    | 2006–2010 | Case-Crossover | HA        | All        | 16,721        | Medicare data                                                                  |
| Tsai et al.       | 2009 | Taiwan                    | 2000–2006 | Case-Crossover | HA        | All        | 21,581        | Medicare data                                                                  |
| Bunch et al.      | 2011 | USA                       | 1993–2008 | Case-Crossover | HA        | All        | 10,457        | Medicare data                                                                  |
| Zhao et al.       | 2014 | China                     | 2010–2011 | Time-Series    | HA        | All        | 56,940        | Hospital outpatient records                                                    |
| Santos et al.     | 2008 | Brazil                    | 1998–1999 | Time-Series    | HA        | ≥17 years  | 3251          | Heart institute of the university of sao paulo medical school                  |
| Ueda et al.       | 2009 | Japan                     | 2002–2004 | Time-Series    | Mortality | All        | 7083          | Ministry of health                                                             |
| Poloniecki et al. | 1997 | UK                        | 1987–1994 | Time-Series    | HA        | All        | NR            | Hospital episode records                                                       |
| Hoek et al.       | 2011 | Netherland                | 1986–1994 | Time-Series    | Mortality | All        | NR            | Death certificates central beureau of statistics                               |
| Burnett et al.    | 1999 | Canada                    | 1980–1994 | Time-Series    | HA        | All        | NR            | Ontario Ministry of health                                                     |
| Halonen et al.    | 2009 | Finland                   | 1998–2004 | Time-Series    | Mortality | ≥65 years  | 10,423        | National registers                                                             |
| Koken et al.      | 2003 | USA                       | 1993–1997 | Time-Series    | HA        | >65 years  | NR            | Agency for healthcare research and quality                                     |
| Linn et al.       | 2000 | USA                       | 1992–1995 | Time-Series    | HA        | ≥30 years  | NR            | Office of statewide health planning and development (OSHPD)                    |
| Stieb et al.      | 2009 | Canada                    | 1992–2003 | Time-Series    | HA        | All        | 45,160        | Emergency department registry                                                  |
| Haley et al.      | 2009 | USA                       | 2001–2005 | Case-Crossover | HA        | ≥35 years  | 110,131       | New York state hospitals and department of health registry                     |
| Chiusolo et al.   | 2011 | Italy                     | 2001–2005 | Case-Crossover | Mortality | >35 years  | 34,529        | Census office registry                                                         |
| Peel et al.       | 2007 | USA                       | 1993–2000 | Both           | HA        | All        | 12,839        | Emergency department billing data                                              |
| Colais et al.     | 2012 | Italy                     | 2001–2005 | Case-Crossover | HA        | ≥65 years  | 32,924        | Hospital discharge registry                                                    |
| Chang et al.      | 2015 | Taiwan                    | 2006–2010 | Case-Crossover | HA        | All        | 5688          | National health insurance (NHI)                                                |
| Milojevic et al.  | 2014 | UK                        | 2003–2009 | Case-Crossover | Both      | All        | 391,308       | MINAP €, HES §§, Mortality (office for national statistics)                    |
| Tolbert et al.    | 2000 | USA                       | 1993–2000 | Time-Series    | HA        | All        | 4099          | Billing data                                                                   |
| Goldberg et al.   | 2013 | Canada                    | 1990–2003 | Time-Series    | Mortality | ≥65 years  | 23,315        | Death certificates                                                             |
| Lippmann et al.   | 2000 | Canada                    | 1992–1994 | Time-Series    | HA        | ≥65 years  | 7672          | Medicare data                                                                  |

\* NR: Not Reported.; § HA: Hospital Admissions. € MINAP: The Myocardial Ischaemia National Audit Project. §§ HES: Hospital Episode Statistics. Bunch et al. and Tolbert et al. did not presented complete data and were excluded in meta-analysis.

**Table S3.** Characteristics and quality assessment of included studies in the systematic review.

| Author            | Year | Single/Multi City | Single Lag | Shortest Lag * | Diagnostic Evidence of Disease | Daily Pollutant Measurement | Season | Time Trends | Meteorological Parameters § | Influenza | Risk of Bias |
|-------------------|------|-------------------|------------|----------------|--------------------------------|-----------------------------|--------|-------------|-----------------------------|-----------|--------------|
| Barnett et al.    | 2006 | M                 | N          | 0–1            | ICD-9, ICD-10 <sup>¢</sup>     | Y                           | Y      | Y           | Y                           | N         | Low          |
| Talbott et al.    | 2014 | M                 | Y          | 0              | ICD-9                          | Y                           | Y      | Y           | Y                           | N         | Low          |
| Guo et al.        | 2008 | S                 | Y          | 0              | ICD-10                         | Y                           | Y      | Y           | Y                           | N         | Low          |
| Chiu et al.       | 2013 | S                 | Y          | 0              | ICD-9                          | Y                           | Y      | Y           | Y                           | N         | Low          |
| Tsai et al.       | 2009 | S                 | Y          | 0              | ICD-9                          | Y                           | Y      | Y           | Y                           | N         | Low          |
| Bunch et al.      | 2011 | S                 | Y          | 0              | NR <sup>#</sup>                | Y                           | Y      | Y           | Y                           | N         | High         |
| Zhao et al.       | 2014 | S                 | Y          | 0              | Electrocardiogram Criteria     | Y                           | Y      | Y           | Y                           | N         | Low          |
| Santos et al.     | 2008 | S                 | Y          | 0              | ICD-10                         | Y                           | Y      | Y           | Y                           | N         | Low          |
| Ueda et al.       | 2009 | M                 | Y          | 0              | ICD-10                         | Y                           | Y      | Y           | Y                           | N         | Low          |
| Poloniecki et al. | 1997 | S                 | Y          | 1              | ICD-9                          | Y                           | Y      | Y           | Y                           | N         | Low          |
| Hoek et al.       | 2011 | M                 | Y          | 0-6            | ICD-9                          | Y                           | Y      | Y           | Y                           | N         | Low          |
| Burnett et al.    | 1999 | S                 | Y          | 1              | ICD-9                          | Y                           | Y      | Y           | Y                           | N         | Low          |
| Halonen et al.    | 2009 | S                 | Y          | 0              | ICD-10                         | Y                           | Y      | Y           | Y                           | Y         | Low          |
| Koken et al.      | 2003 | S                 | Y          | 0              | ICD-9                          | Y                           | N      | N           | Y                           | N         | High         |
| Linn et al.       | 2000 | S                 | Y          | 0              | APR-DRG ¶                      | Y                           | Y      | Y           | Y                           | N         | Low          |
| Stieb et al.      | 2009 | M                 | Y          | 0              | ICD-9, ICD-10                  | Y                           | Y      | Y           | Y                           | N         | Low          |
| Haley et al.      | 2009 | S                 | Y          | 0              | ICD-9                          | Y                           | Y      | Y           | Y                           | N         | Low          |
| Chiusolo et al.   | 2011 | M                 | Y          | 0-5            | ICD-9                          | Y                           | Y      | Y           | Y                           | Y         | Low          |
| Peel et al.       | 2007 | S                 | N          | 0-2            | ICD-9                          | Y                           | Y      | Y           | Y                           | N         | Low          |
| Colais et al.     | 2012 | M                 | Y          | 0              | ICD-9                          | Y                           | Y      | Y           | Y                           | Y         | Low          |
| Chang et al.      | 2015 | S                 | N          | 0-2            | ICD-9                          | Y                           | Y      | Y           | Y                           | N         | Low          |
| Milojevic et al.  | 2014 | M                 | N          | 0-4            | ICD-10                         | Y                           | Y      | Y           | Y                           | N         | Low          |
| Tolbert et al.    | 2000 | S                 | Y          | 0              | ICD-9                          | Y                           | Y      | Y           | Y                           | N         | Low          |
| Goldberg et al.   | 2013 | S                 | Y          | 0              | ICD-9                          | Y                           | Y      | Y           | Y                           | N         | Low          |
| Lippmann et al.   | 2000 | S                 | Y          | 0              | ICD-9                          | Y                           | Y      | Y           | Y                           | Y         | Low          |

\* Shortest Lag: The shortest lag day presented in study to analyze the association between air pollution and arrhythmia. § Meteorological Parameters: Refers to temperature and humidity in our study. ¶ APR-DRG: All-Patient-Refined Diagnosis-Related Group. ¢ ICD: International Classification of Diseases. # NR: Not Reported. Y: Yes. N: No. S: Single City. M: Multi City.

**Table S4.** Daily concentrations of air pollutants by geographical location.

| Air Pollutants                                      | Median <sup>#</sup> | First Quartile | Third Quartile |
|-----------------------------------------------------|---------------------|----------------|----------------|
| PM <sub>2.5</sub> (µg/m <sup>3</sup> ) <sup>¶</sup> |                     |                |                |
| Europe                                              | 9.750               | 6.250          | 13.350         |
| North America                                       | 9.673               | 6.382          | 14.103         |
| Asia                                                | 30.153              | 19.224         | 41.453         |
| PM <sub>10</sub> (µg/m <sup>3</sup> )               |                     |                |                |
| Europe                                              | 30.737              | 21.530         | 48.222         |
| North America                                       | 32.587              | 23.356         | 42.484         |
| Asia                                                | 81.313              | 54.407         | 116.867        |
| CO (ppm)                                            |                     |                |                |
| Europe                                              | 0.475               | 0.375          | 0.801          |
| North America                                       | 1.248               | 0.843          | 1.724          |
| Asia                                                | 0.940               | 0.700          | 1.190          |
| O <sub>3</sub> (ppb)                                |                     |                |                |
| Europe                                              | 21.133              | 13.139         | 32.728         |
| North America                                       | 25.335              | 17.353         | 34.134         |
| Asia                                                | 22.520              | 16.230         | 28.660         |
| NO <sub>2</sub> (ppb)                               |                     |                |                |
| Europe                                              | 20.533              | 14.320         | 28.138         |
| North America                                       | 29.361              | 22.023         | 36.932         |
| Asia                                                | 25.785              | 20.223         | 32.263         |
| SO <sub>2</sub> (ppb)                               |                     |                |                |
| Europe                                              | 4.038               | 2.333          | 9.257          |
| North America                                       | 6.974               | 3.164          | 11.153         |
| Asia                                                | 7.475               | 5.043          | 11.143         |

<sup>¶</sup> PM: Particulate Matter. <sup>#</sup> Median, first quartile and third quartile pollutant concentration derived from the average daily pollutant concentrations reported per study.

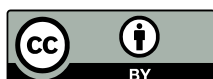

© 2016 by the authors; licensee MDPI, Basel, Switzerland. This article is an open access article distributed under the terms and conditions of the Creative Commons by Attribution (CC-BY) license (<http://creativecommons.org/licenses/by/4.0/>).
